# Supplementary material for: A self-healing and stretchable light-emitting device
Source: Royal Society of Chemistry journal article supplement (doi:10.1039/c8tc02828a), 2018-01-01
Supplement: c8tc02828a1.pdf [file c8tc02828a1.pdf]

## Supporting Information

### A Self-healing and Stretchable Light-emitting Device

*Xiang Shi, Xufeng Zhou, Ye Zhang, Xiaojie Xu, Zhitao Zhang,*

*Peng Liu, Yong Zuo, Huisheng Peng\**

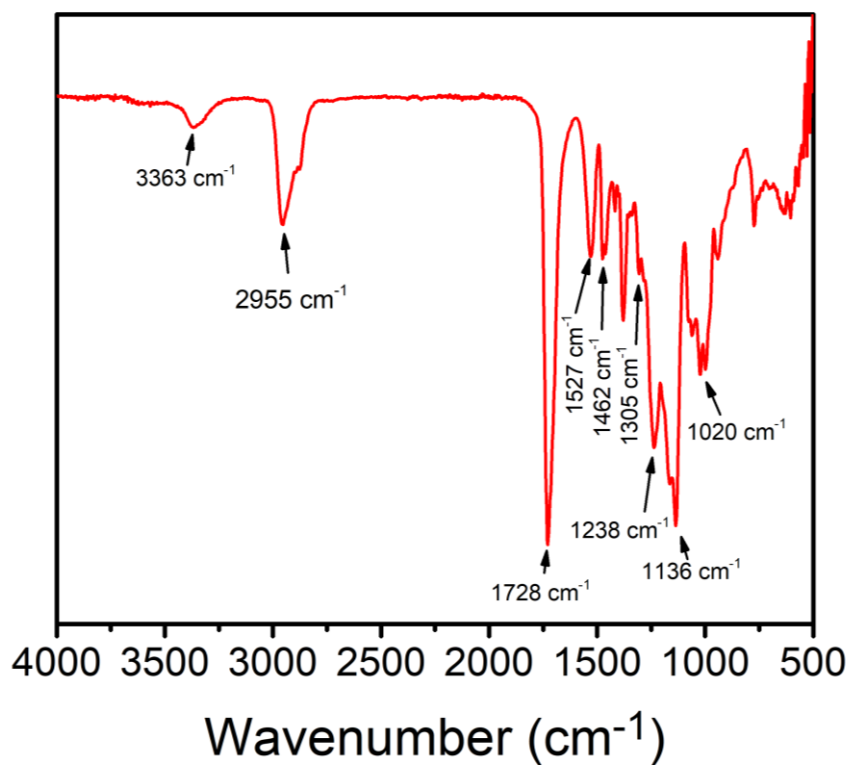

**Figure S1.** Fourier transform infrared spectrum of synthesized self-healing PU with the following characteristic peaks of  $3363 \text{ cm}^{-1}$  ( $\nu(\text{-NH-})$ ),  $2955 \text{ cm}^{-1}$  ( $\nu(\text{CH}_3, \text{CH}_2)$ ),  $1728 \text{ cm}^{-1}$  ( $\nu(\text{C=O})$ ),  $1527 \text{ cm}^{-1}$  ( $\delta(\text{C-N-H})$ ),  $1462 \text{ cm}^{-1}$  ( $\delta(\text{CH}_2)$ ),  $1305 \text{ cm}^{-1}$  ( $\delta(\text{C}(\text{C=O})\text{-N-H})$ ),  $1238 \text{ cm}^{-1}$ ,  $1136 \text{ cm}^{-1}$  ( $\nu(\text{C-O-C})$ ) and  $1020 \text{ cm}^{-1}$  ( $\delta(\text{C-O-C})$ ).

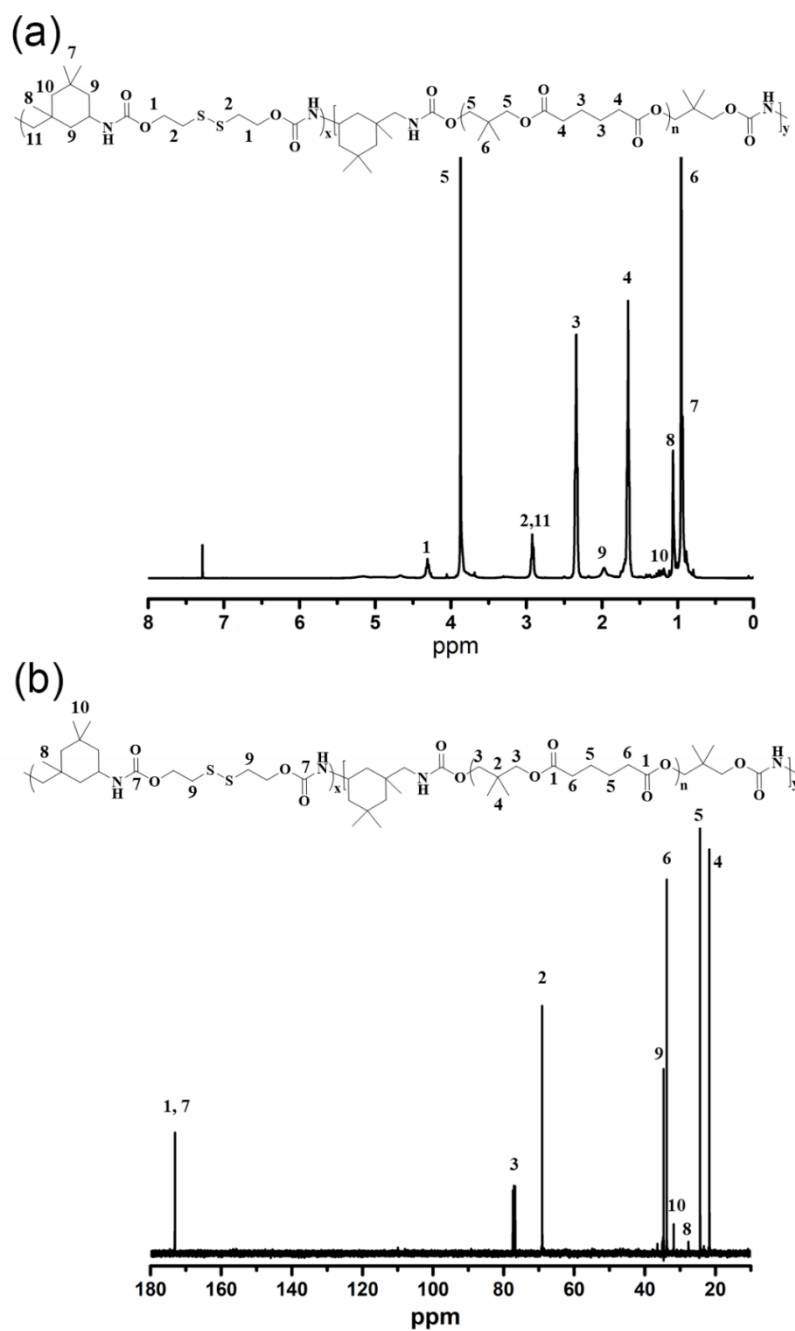

**Figure S2.** (a) <sup>1</sup>H NMR spectrum (CDCl<sub>3</sub>) of self-healing PU.  $\delta$  (ppm) = 7.28 (CDCl<sub>3</sub>), 4.32 (1H, -O-CH<sub>2</sub>-), 3.88 (5H, -O-CH<sub>2</sub> of PPGA), 2.92 (2H, 11H, , S-CH<sub>2</sub>-, -N-CH<sub>2</sub>-), 2.35 (3H, -CH<sub>2</sub>- of PPGA), 1.92 (9H, -CH<sub>2</sub>- of IPDI), 1.66 (4H, O=C-CH<sub>2</sub>- of PPGA), 1.20-1.17 (10H, -CH<sub>2</sub>- of IPDI), 1.07 (8H, -CH<sub>3</sub> of IPDI), 1.050 (6H, -CH<sub>3</sub> of PPGA), and 0.94 (1H, -CH<sub>3</sub> of IPDI). (b) <sup>13</sup>C NMR spectrum (CDCl<sub>3</sub>) of self-healing PU.  $\delta$  (ppm) = 173.0 (1C, 2C, C=O), 77.2 (3C, O-CH<sub>2</sub>-), 69.0 (2C, CH<sub>2</sub>-C(CH<sub>3</sub>)<sub>2</sub>-CH<sub>2</sub>), 34.7 (9C, S-CH<sub>2</sub>-), 33.8 (6C, CH<sub>2</sub>), 31.8 (10C, CH<sub>3</sub>), 27.6 (8C, CH<sub>3</sub>), 24.3 (5C, CH<sub>2</sub>), 21.7 (4C, CH<sub>3</sub>).

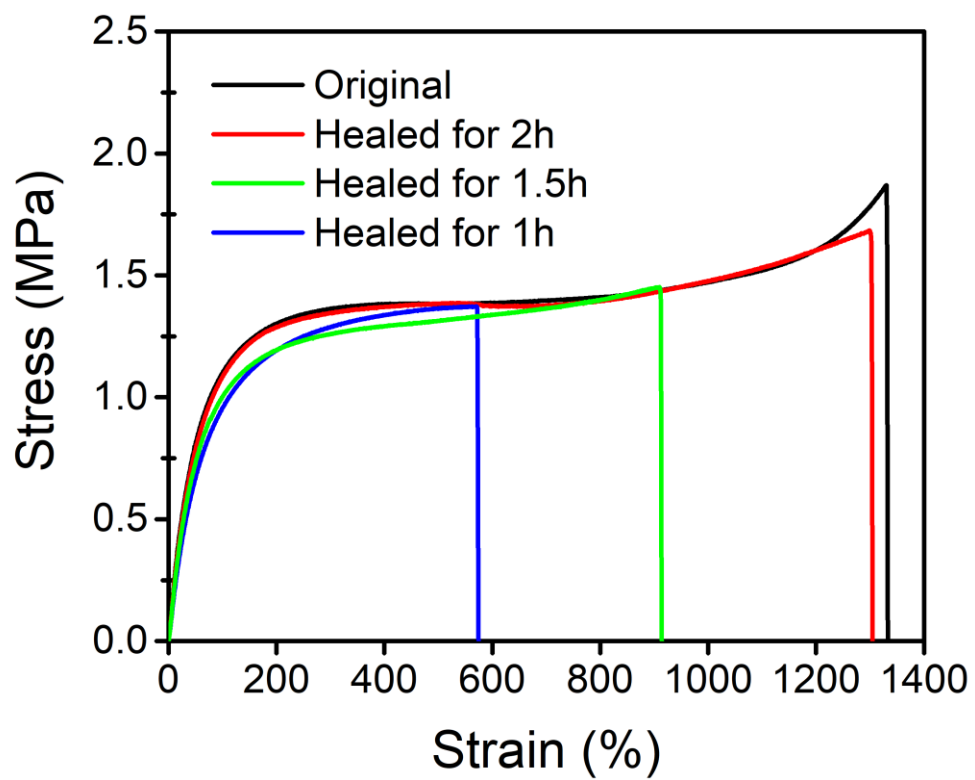

**Figure S3.** Tensile stress-strain curves of original and healed PU.

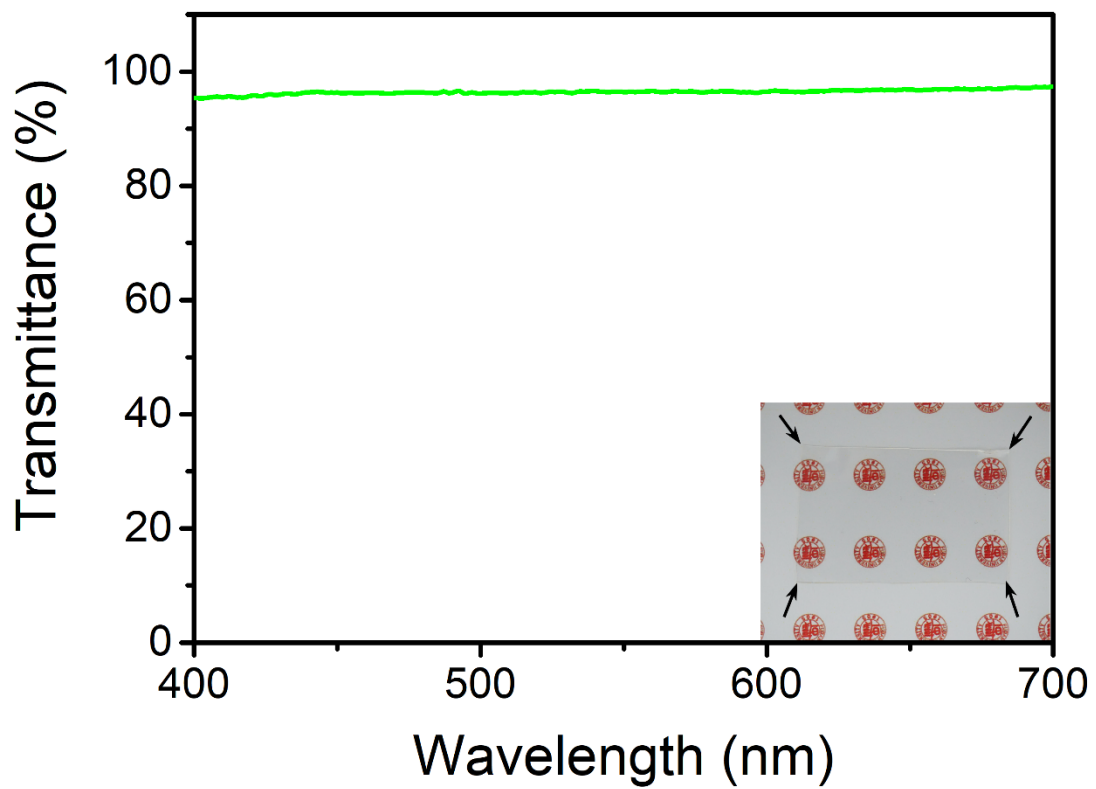

**Figure S4.** Dependence of optical transmittance on wavelength for a 200  $\mu\text{m}$ -thick PU film (inset, photograph of a transparent PU film).

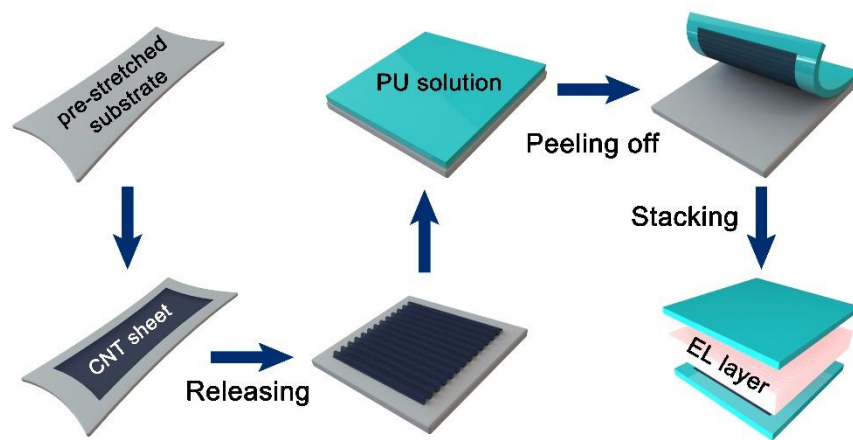

**Figure S5.** Schematic illustration to the fabrication process of a self-healing EL device.

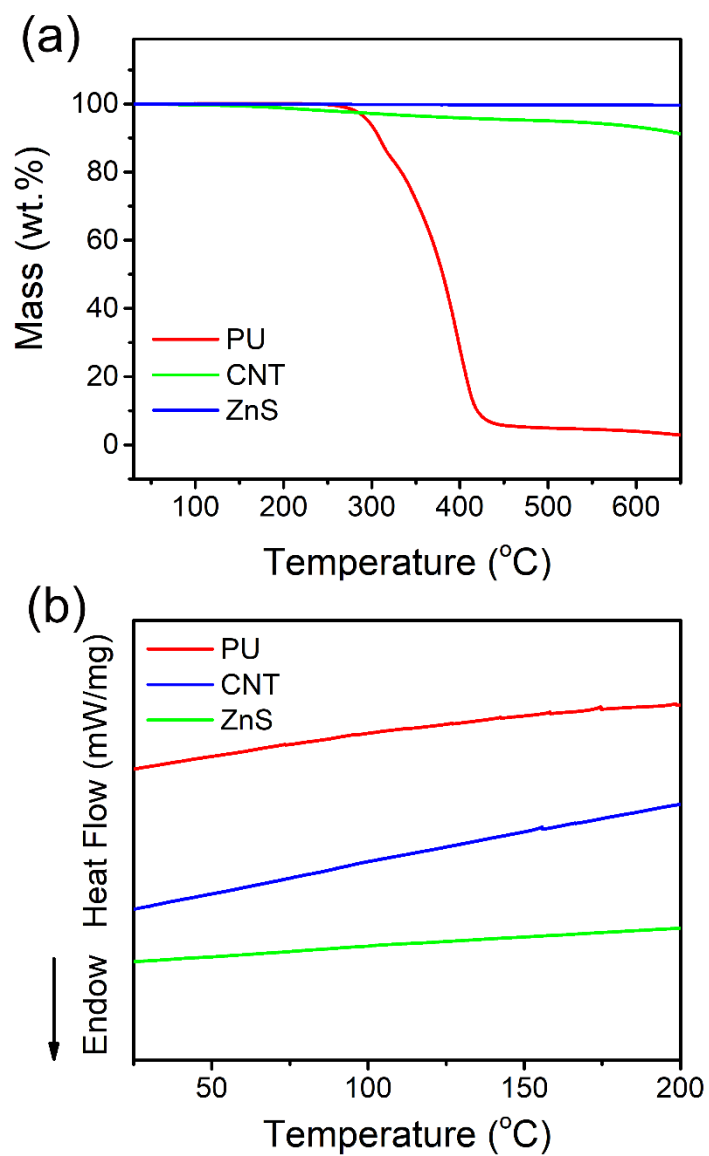

**Figure S6.** (a) Thermal gravimetric analysis (TGA) and (b) differential scanning calorimetry (DSC) of PU, ZnS phosphor and carbon nanotube.

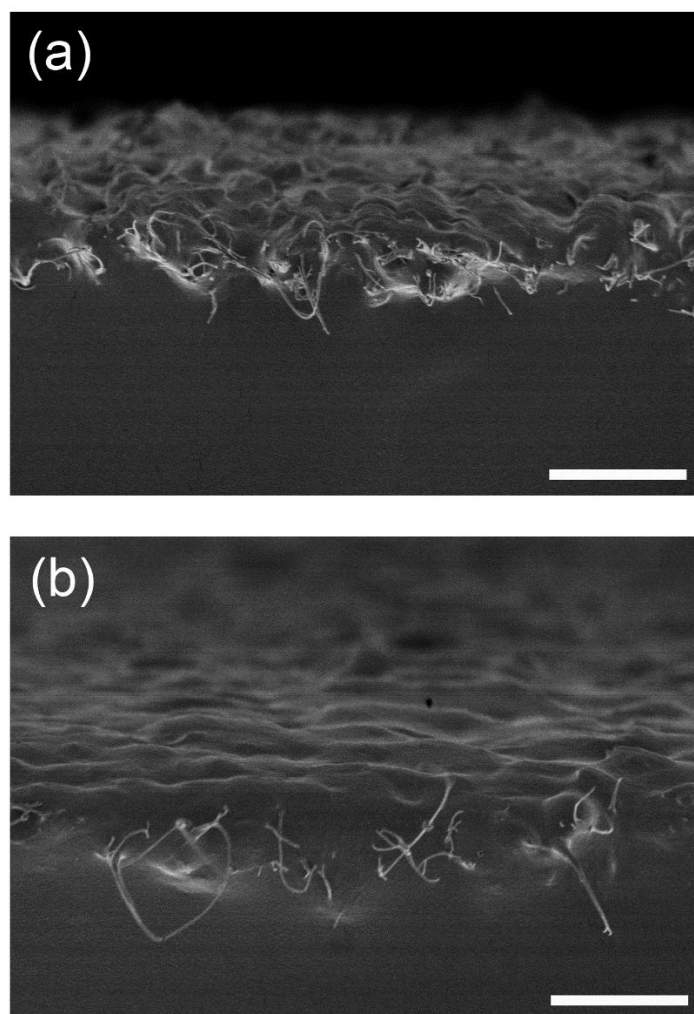

**Figure S7.** Cross-sectional SEM images of aligned CNT/PU composite electrodes with the interface being parallel (a) and vertical (b) to the alignment of CNTs. Scale bars, 2.5  $\mu\text{m}$ .



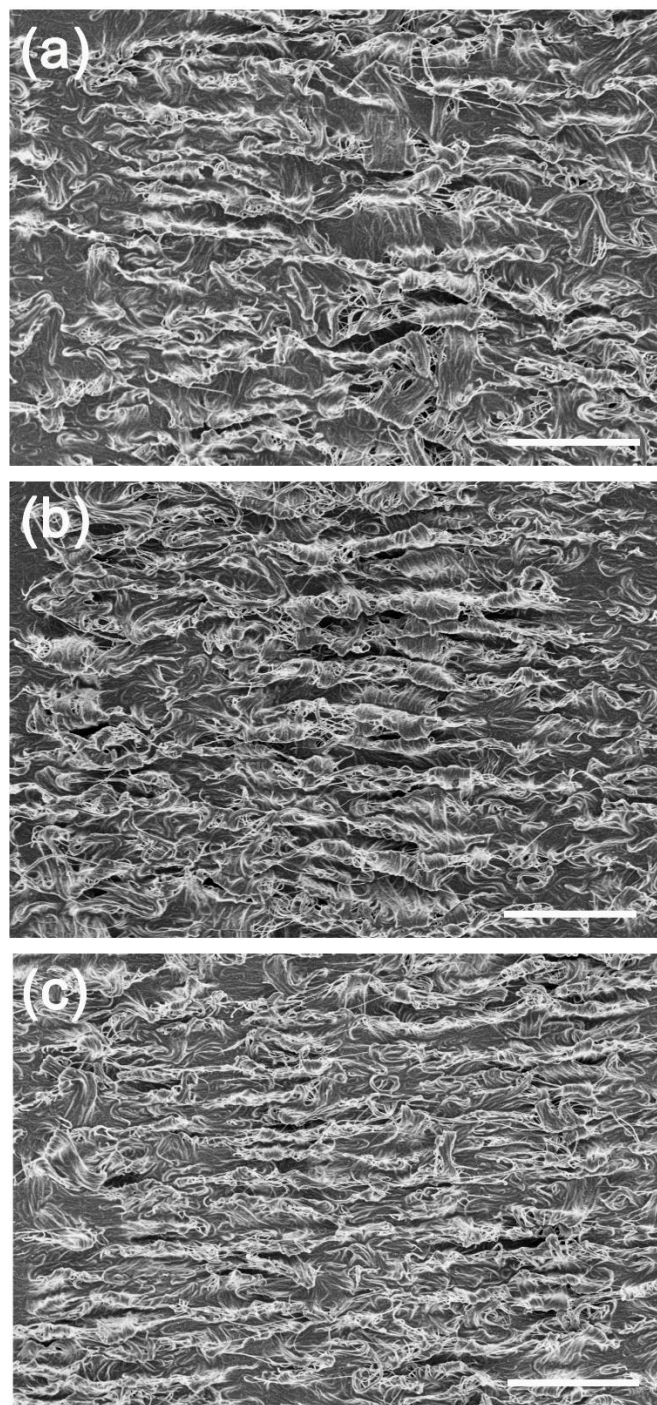

**Figure S8.** SEM images of bare wrinkled CNT sheets on the elastic films released from the pre-stretched substrates with the strains of (a) 200%, (b) 300% and (c) 400%. Scale bars, 5 $\mu$ m.

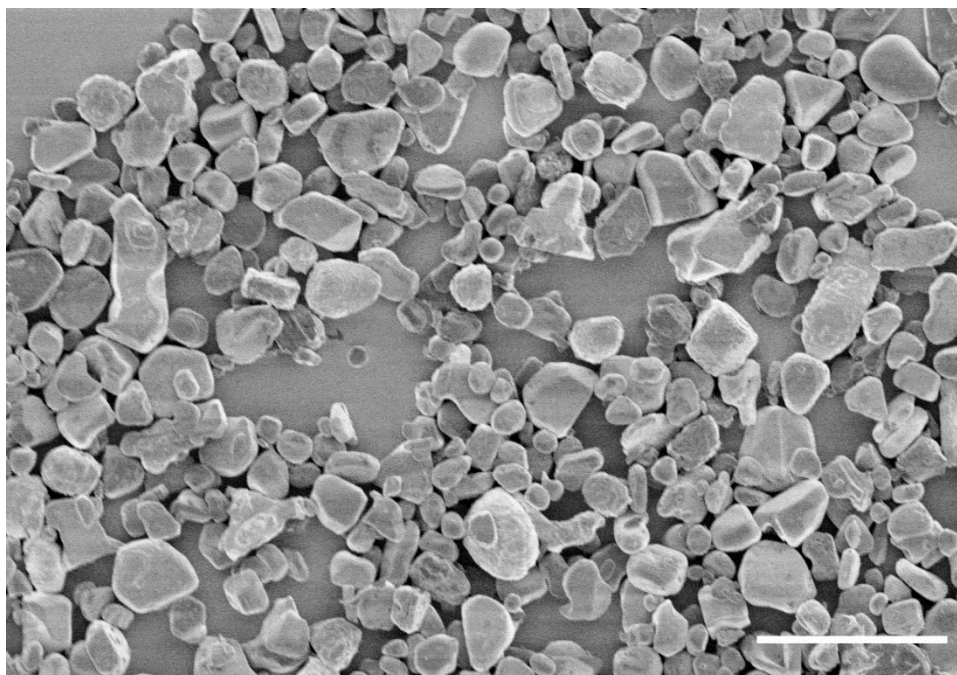

**Figure S9.** SEM image of ZnS phosphor. Scale bar, 50  $\mu\text{m}$ .

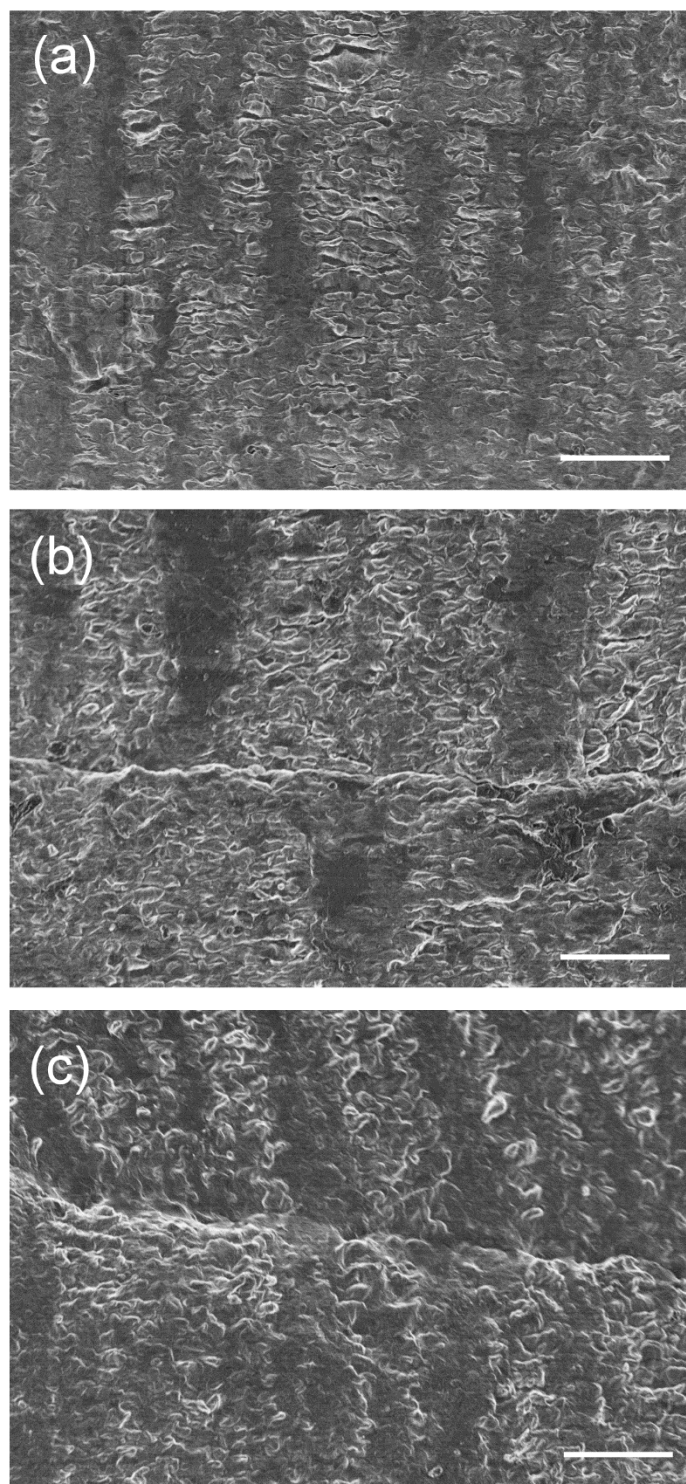

**Figure S10.** SEM images of the CNT/PU composite electrodes (a) before and (b) after healing and (c) stretched to 400%. Scale bars, 10  $\mu\text{m}$ .

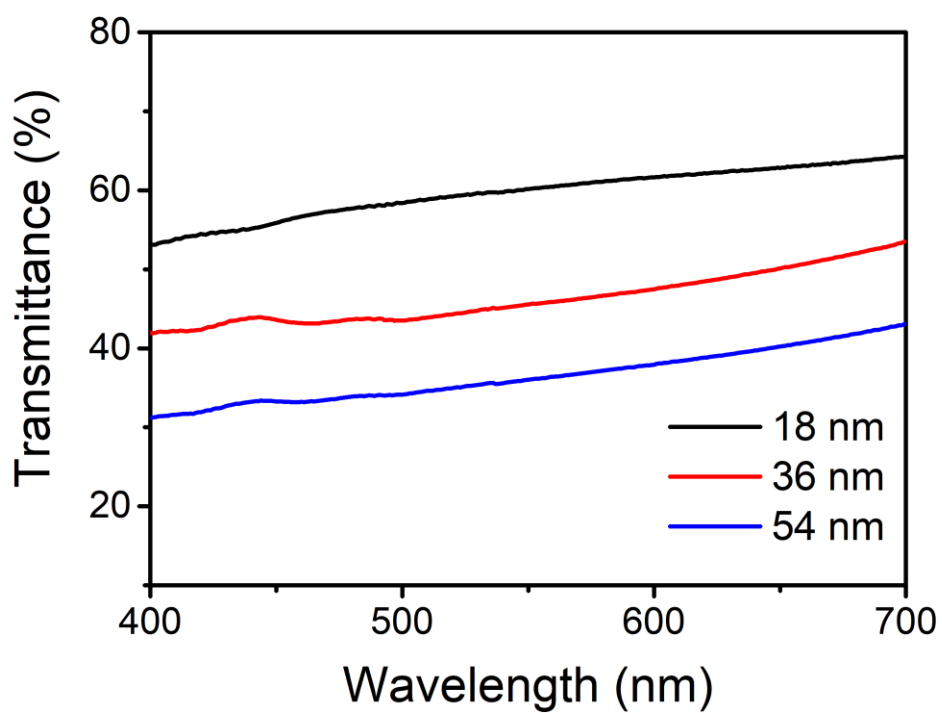

**Figure S11.** Dependence of optical transmittance on the thickness of aligned CNT sheet electrodes.

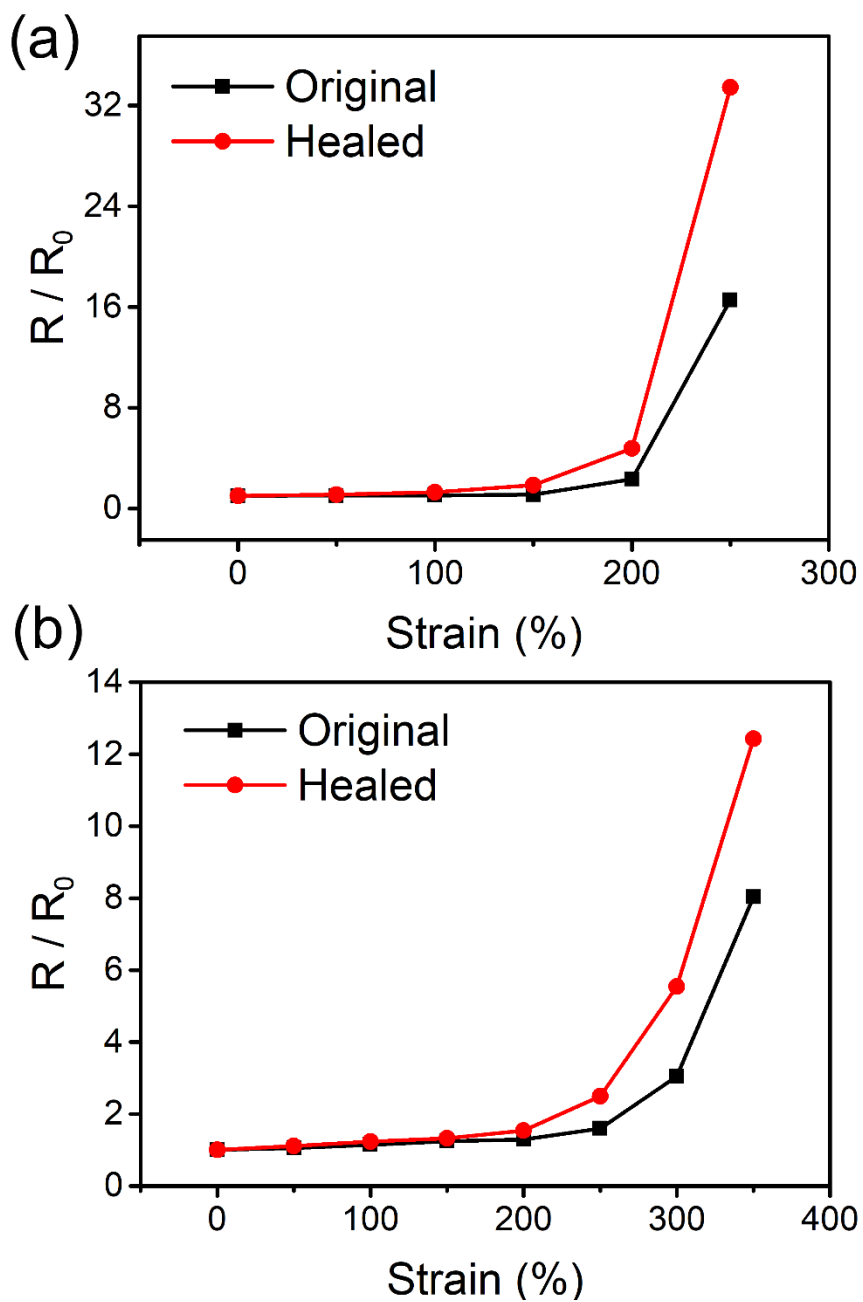

**Figure S12.** Dependence of electrical resistance on the pre-stretched strain of (a) 200% and (b) 300%.

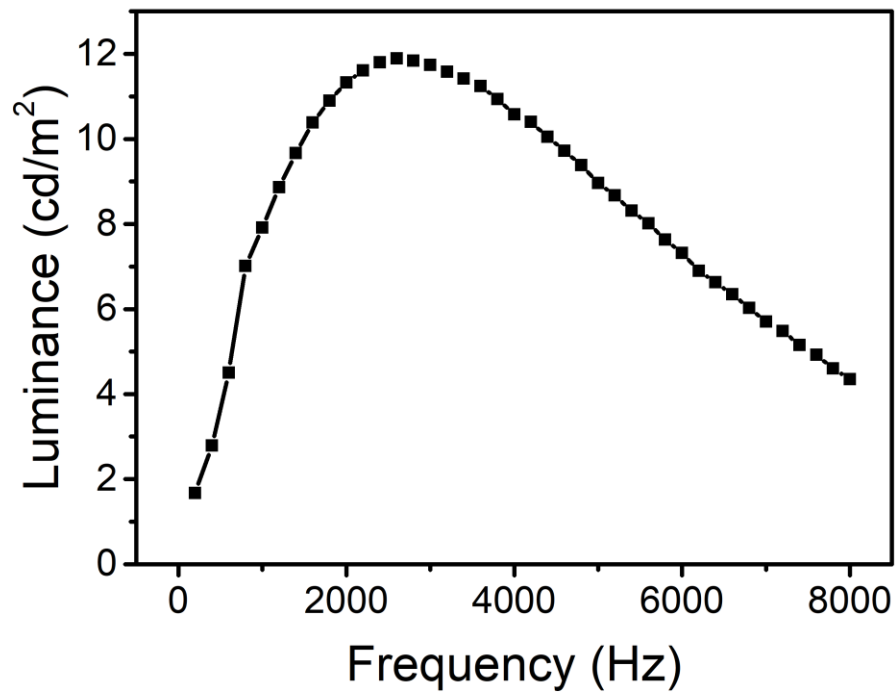

**Figure S13.** Dependence of luminance on the applied frequency.

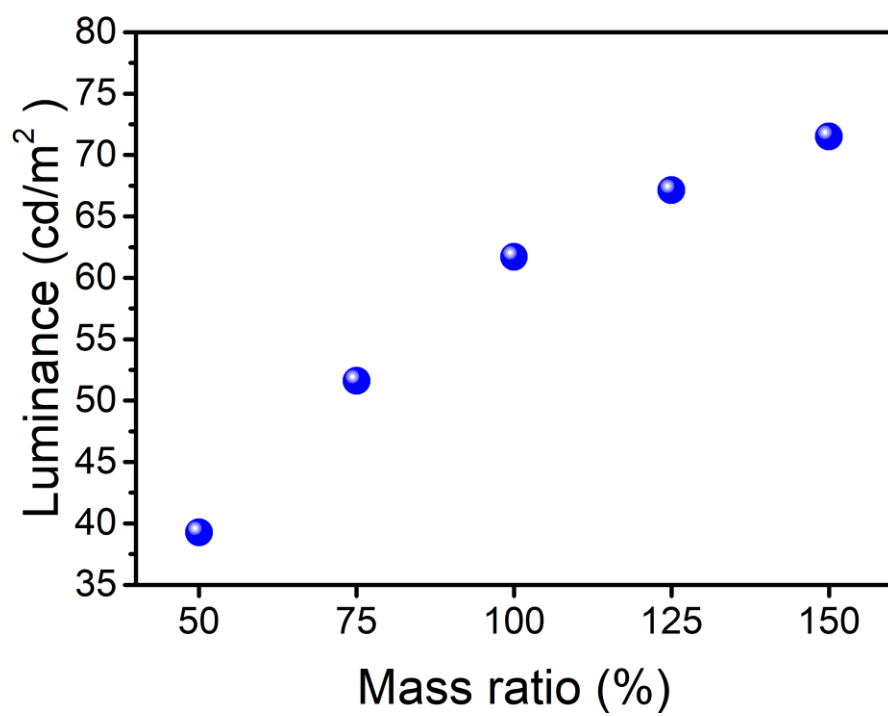

**Figure S14.** Dependence of luminance on the ZnS mass ratio ( $m(\text{ZnS})/m(\text{PU})$ ) (driving voltage of  $8 \text{ V}/\mu\text{m}$ ).

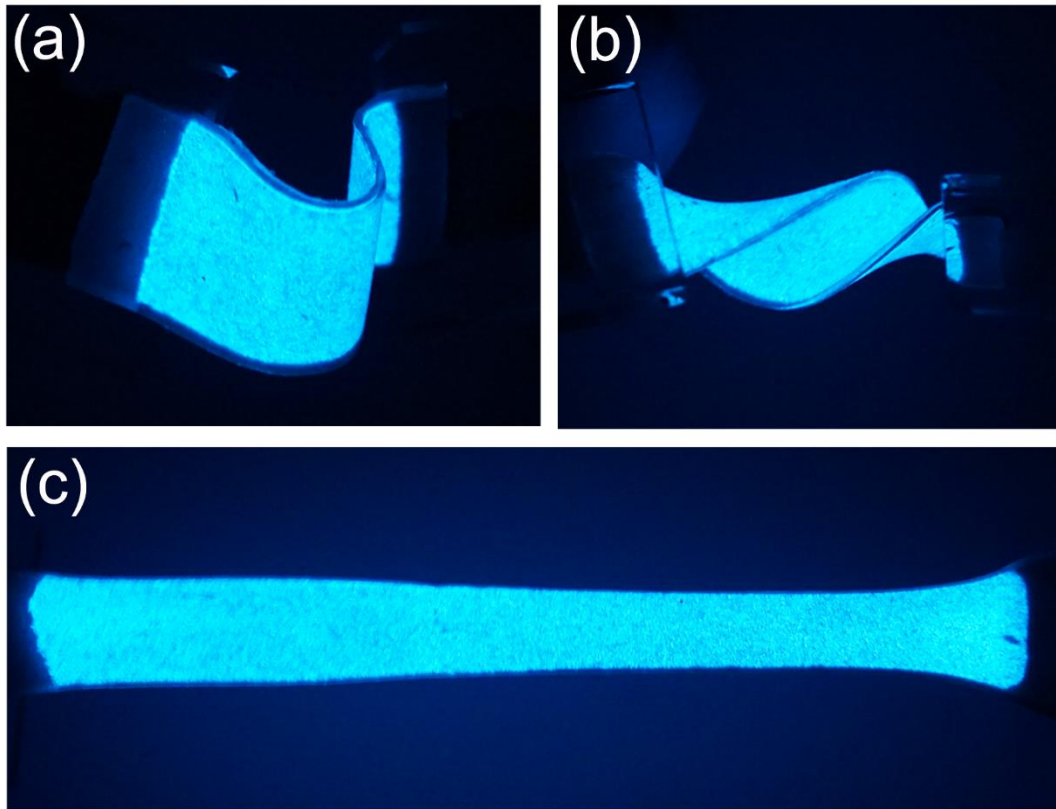

**Figure S15.** Photographs of a healed EL device being bent (a), twisted (b) and stretched (c).



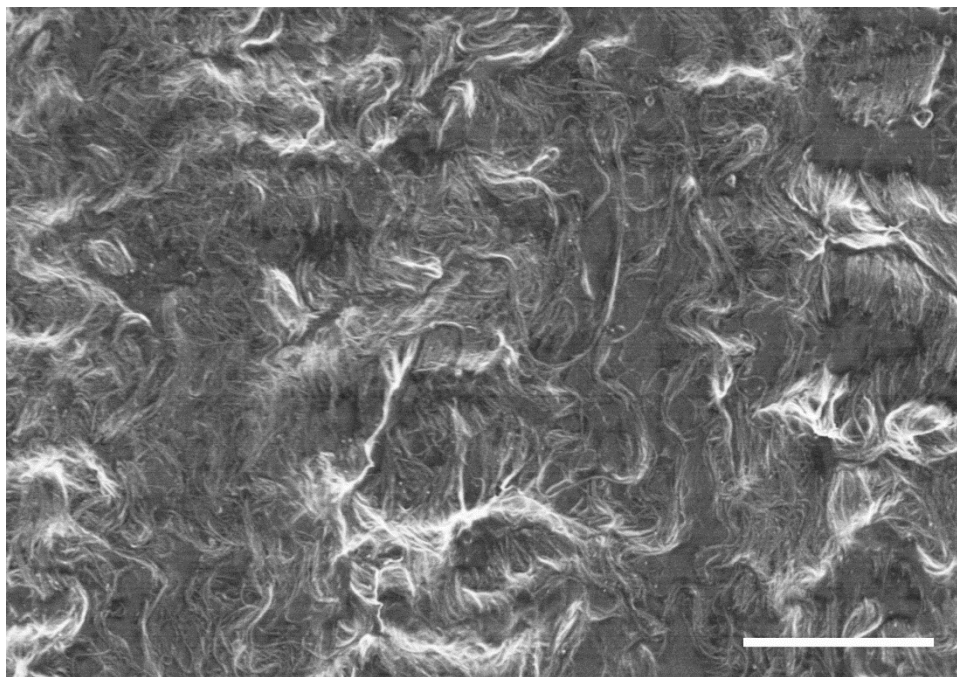

**Figure S16.** SEM image of a CNT/PU composite electrode at a strain of 400%. Scale bar, 5  $\mu\text{m}$ .

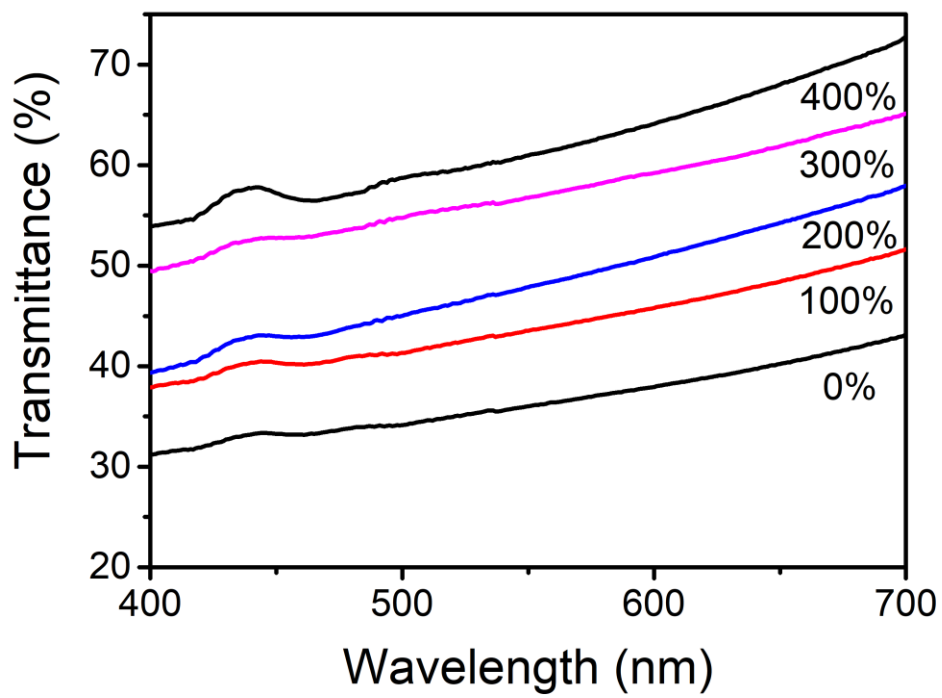

**Figure S17.** Dependence of optical transmittance on strain of aligned CNT sheets.

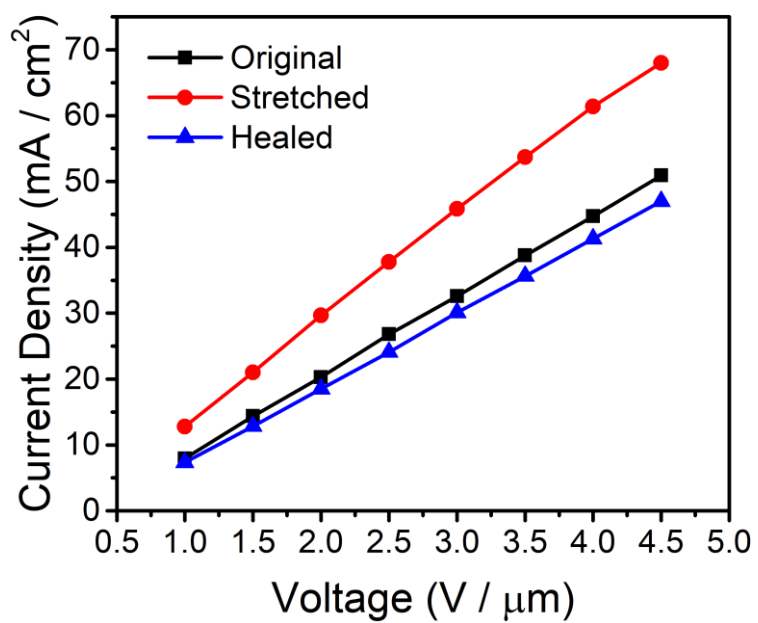

**Figure S18.** Current density-voltage curve of the EL device before and after healing and stretching.

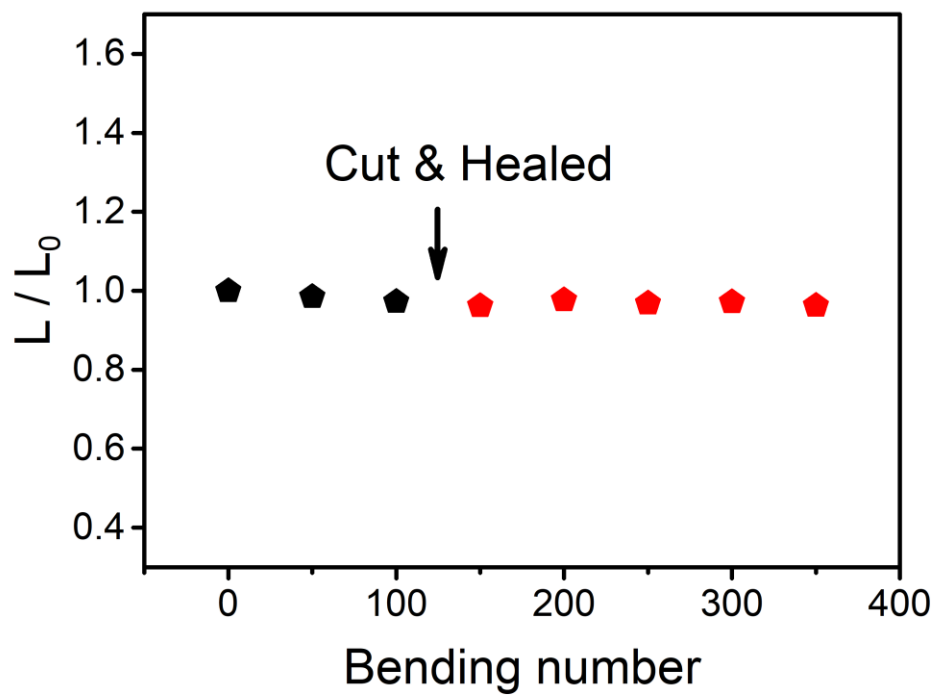

**Figure S19.** Dependence of luminance on the stretching cycle number.  $L_0$  and  $L$  correspond to the luminance before and after bending, respectively.

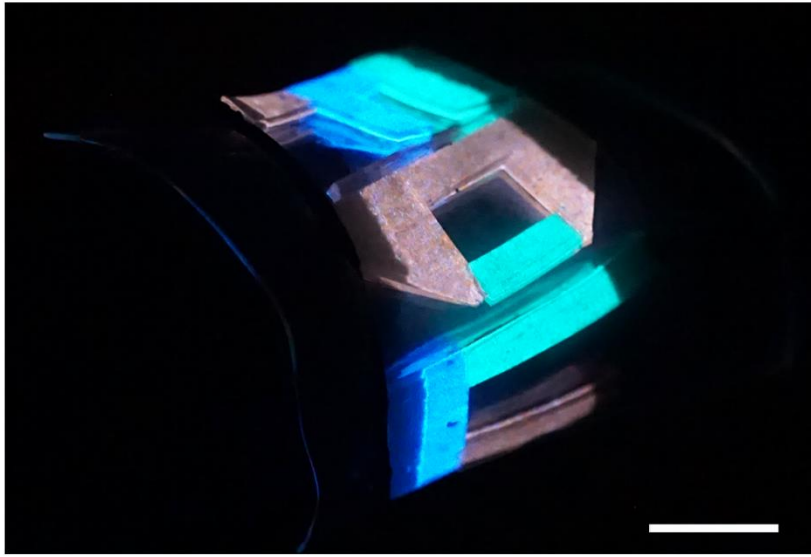

**Figure S20.** Flexible multi-colored device wrapped on a finger. Scale bar, 0.5 cm.
